# Supplementary material for: Spatio-temporal Analysis of Deaths From Carbon Monoxide Poisoning in Iran Between 2011 and 2018- An Ecological Study
Source: Research Square preprint supplement (doi:10.21203/rs.3.rs-132660/v1), 2021-01-05
Supplement: Supplementary file 1 [file c26e8cb6f6e544539ca9af7e.docx]

Table 1. Number of death and mortality rates due to CO poisoning by gender in Iran between 2011 and 2018

| Mortality rate per 100,000 population | | | | Death (n) | | | Population  (million) | | | Persian year | Christian Year |
| --- | --- | --- | --- | --- | --- | --- | --- | --- | --- | --- | --- |
| Male/female | Both sexes | Female | Male | Both sexes | Female | Male | Both sex | male | female |
| 2.76 | 1.26 | 0.68 | 1.88 | 950 | 253 | 712 | 75,150 | 37906 | 37244 | 1390 | 2011 |
| 2.33 | 0.92 | 0.55 | 1.28 | 697 | 207 | 490 | 76,075 | 38403 | 37672 | 1391 | 2012 |
| 2.40 | 1.08 | 0.63 | 1.51 | 828 | 240 | 588 | 77,016 | 38915 | 38101 | 1392 | 2013 |
| 2.90 | 0.80 | 0.41 | 1.19 | 626 | 158 | 468 | 77,970 | 39434 | 38536 | 1393 | 2014 |
| 3.27 | 0.79 | 0.37 | 1.21 | 626 | 144 | 482 | 78,940 | 39961 | 38979 | 1394 | 2015 |
| 2.78 | 1.05 | 0.55 | 1.53 | 836 | 216 | 620 | 79,926 | 40498 | 39428 | 1395 | 2016 |
| 2.74 | 0.94 | 0.50 | 1.37 | 766 | 202 | 564 | 81070 | 41049 | 40021 | 1396 | 2017 |
| 3.21 | 0.91 | 0.43 | 1.38 | 749 | 176 | 573 | 82084 | 41538 | 40546 | 1397 | 2018 |
